# Supplementary material
Source: Springer Nature journal article supplement (https://www.springermedizin.de/resource/supplementary/12936_2011_1817_MOESM9_ESM.pdf/9541826)
Supplement: MOESM9 [file 9541826]

Vulnerablility

*Influences*

Participation

*Influences*
